# Supplementary material for: Early Response Prediction of Multiparametric Functional MRI and 18F-FDG-PET in Patients with Head and Neck Squamous Cell Carcinoma Treated with (Chemo)Radiation
Source: MDPI journal article supplement (doi:10.3390/cancers14010216), 2022-01-03
Supplement: s1 [file s1]

# Supplementary Materials: Early Response Prediction of Multiparametric Functional MRI and <sup>18</sup>F-FDG-PET in Patients with Head and Neck Squamous Cell Carcinoma Treated with (Chemo)Radiation

Roland M. Martens, Thomas Koopman, Cristina Lavini, Tim van de Brug, Gerben J.C. Zwezerijnen, J. Tim Marcus, Marije R. Vergeer, C. René Leemans, Remco de Bree, Pim de Graaf, Ronald Boellaard and Jonas A. Castelijns

**Table S1.** Interobserver correlation quantitative MRI-parameters.

| PRETREATMENT  |                            |                 |                |                           | INTRATREATMENT |                |                |                           |             |
|---------------|----------------------------|-----------------|----------------|---------------------------|----------------|----------------|----------------|---------------------------|-------------|
| Primary tumor |                            |                 |                |                           |                |                |                |                           |             |
|               |                            | Observer 1      | Observer 2     | Difference                | Correlation    | Observer 1     | Observer 2     | Difference                | Correlation |
|               |                            | Mean (SD)       | Mean (SD)      | Wilcoxon Signed rank test | Pearsons r     | Mean (SD)      | Mean (SD)      | Wilcoxon Signed rank test | Pearsons r  |
| DWI           | ADC_GTV(x103cm³)           | 10.504 (10.055) | 10.051 (8.991) | 0.069                     | 0.944          | 10.871 (0.104) | 10.927 (0.105) | 0.476                     | 0.997       |
|               | ADC_median(x103mm²/s)      | 0.105 (0.182)   | 0.105 (0.180)  | 0.292                     | 0.994          | 0.126 (0.199)  | 0.126 (0.181)  | 0.687                     | 0.971       |
|               | ADC_skewness               | 0.368 (0.508)   | 0.396 (0.519)  | 0.870                     | 0.847          | 0.222 (0.452)  | 0.233 (0.463)  | 0.851                     | 0.921       |
|               | ADC_kurtosis               | 3.769 (1.21)    | 3.732 (1.318)  | 0.515                     | 0.910          | 3.295 (0.806)  | 3.318 (0.837)  | 0.771                     | 0.869       |
| IVIM          | D(mm²/s)                   | 0.009 (0.001)   | 0.009 (0.140)  | 0.633                     | 0.986          | 0.001 (<0.001) | 0.001 (<0.001) | 0.674                     | 0.986       |
|               | f(mm²/s)                   | 0.099 (0.061)   | 0.100 (0.062)  | 0.870                     | 0.991          | 0.101 (0.046)  | 0.102 (0.052)  | 0.307                     | 0.960       |
|               | D*(mm²/s)                  | 0.006 (0.002)   | 0.007 (0.003)  | 0.163                     | 0.994          | 0.006 (0.001)  | 0.006 (0.002)  | 0.077                     | 0.988       |
| DCE           | DCEGTV(cm3)                | 12.035 (9.490)  | 11.414 (9.300) | 0.002                     | 0.985          | 10.099 (8.714) | 9.910 (8.897)  | 0.064                     | 0.872       |
|               | Kep(min⁻¹)                 | 0.830 (0.298)   | 0.745 (0.287)  | <0.001                    | 0.827          | 0.714 (0.261)  | 0.716 (0.283)  | 0.463                     | 0.563       |
|               | K <sup>trans</sup> (min⁻¹) | 0.535 (0.215)   | 0.513 (0.221)  | 0.002                     | 0.808          | 0.646 (0.266)  | 0.606 (0.236)  | 0.013                     | 0.373       |
|               | V <sub>e</sub>             | 0.080 (0.195)   | 0.745 (0.228)  | <0.001                    | 0.775          | 0.983 (0.293)  | 0.944 (0.293)  | 0.841                     | 0.698       |

The mean, standard deviation (SD). the Wilcoxon signed rank test and the Pearson interobserver correlation test of all quantitative MRI-parameters (DWI, IVIM and DCE) calculated for the two observers. Overall, there were significant differences between the delineations of both observers among the DCE parameters for primary tumor and DWI, IVIM and DCE for LNM. The correlation ranged from excellent ( $r > 0.8$ ) to good ( $0.6 < r < 0.8$ ), except for PT Kep and V<sub>e</sub> ( $r=0.563$  and  $r=0.373$ , respectively).

**Table S2. Clinical parameters per patient outcome.**

| Clinical parameters (mean±SD) | Locoregional recurrence-free survival |                |         | Distant metastasis-free survival |            |         | Overall survival |             |         |
|-------------------------------|---------------------------------------|----------------|---------|----------------------------------|------------|---------|------------------|-------------|---------|
|                               | Responders                            | Non-responders | P-value | No DM                            | DM         | P-value | Survival         | Death       | P-value |
| Gender                        | 0.744±0.44                            | 0.833±0.38     | 0.459   | 0.676±0.47                       | 0.95±0.22  | 0.020   | 0.778±0.43       | 0.769±0.43  | 0.944   |
| Age                           | 60.564±8.69                           | 64.667±5.62    | 0.049   | 60.784±9.13                      | 63.85±5.08 | 0.188   | 61.718±8.70      | 62.167±6.58 | 0.661   |
| T-stage                       | 0.718±0.46                            | 0.50±0.51      | 0.112   | 0.784±0.42                       | 0.40±0.50  | 0.004   | 0.590±0.50       | 0.778±0.43  | 0.171   |
| N-stage                       | 0.590±0.50                            | 0.722±0.46     | 0.339   | 0.514±0.51                       | 0.85±0.37  | 0.013   | 0.564±0.50       | 0.778±0.43  | 0.123   |
| HPV                           | 0.308±0.47                            | 0.444±0.51     | 0.319   | 0.243±0.43                       | 0.55±0.51  | 0.022   | 0.462±0.51       | 0.111±0.32  | 0.011   |
| Location primary tumor (PT)   | 0.18±0.39                             | 0.278±0.46     | 0.402   | 0.243±0.43                       | 0.15±0.37  | 0.414   | 0.205±0.41       | 0.222±0.43  | 0.884   |
| Smoking                       | 0.667±0.48                            | 0.556±0.51     | 0.423   | 0.758±0.43                       | 0.50±0.52  | 0.320   | 0.564±0.50       | 0.778±0.43  | 0.087   |

The mean and standard deviation of the clinical parameters per responders versus non-responders, no distant metastasis (No DM) versus distant metastasis (DM), survival versus death, with the Mann-Whitney U test. The significant differences between these groups is marked green ( $p < 0.05$ ). In this analysis all the analysed observables were made binary: For gender, value 1 represents male, 0 is women. For T-stage  $0 < T < 1$  ( $T=0$  when stage is 1 or 2, and  $T=1$  when Stage is 3 or 4). For Nodal stage  $N=0 \Rightarrow$  stage 0 and 1,  $N=1=$  stage 2 and 3,  $0 < N < 1$ . For location PT: 0=oropharynx, 1=Larynx. For smoking: 1= smoker (20 package/years)+ stopped shorter than 2 years)

**Table S3. Primary tumor imaging parameters per patient outcome**

| Primary tumor                         |                            |                        |                  |                |                        |                  |                |                        |                  |                                  |                           |                  |                |                           |                  |       |                           |                  |              |                  |                  |                |           |                  |          |            |                  |       |
|---------------------------------------|----------------------------|------------------------|------------------|----------------|------------------------|------------------|----------------|------------------------|------------------|----------------------------------|---------------------------|------------------|----------------|---------------------------|------------------|-------|---------------------------|------------------|--------------|------------------|------------------|----------------|-----------|------------------|----------|------------|------------------|-------|
| Locoregional recurrence-free survival |                            |                        |                  |                |                        |                  |                |                        |                  | Distant metastasis-free survival |                           |                  |                |                           |                  |       |                           |                  |              | Overall survival |                  |                |           |                  |          |            |                  |       |
| Parameters                            | Pretreatment               |                        |                  | Intratreatment |                        |                  | Delta          |                        |                  | Pretreatment                     |                           |                  | Intratreatment |                           |                  | Delta |                           |                  | Pretreatment |                  |                  | Intratreatment |           |                  | Delta    |            |                  |       |
| (median±stddev)                       | Response<br>rs             | Non-<br>response<br>rs | P-<br>value<br>* | Response<br>rs | Non-<br>response<br>rs | P-<br>value<br>* | Response<br>rs | Non-<br>response<br>rs | P-<br>value<br>* | No DM                            | Distant<br>metastasi<br>s | P-<br>value<br>* | No DM          | Distant<br>metastasi<br>s | P-<br>value<br>* | No DM | Distant<br>metastasi<br>s | P-<br>value<br>* | Survival     | Death            | P-<br>value<br>* | Survival       | Death     | P-<br>value<br>* | Survival | Death      | P-<br>value<br>* |       |
| DWI                                   | ADC_GTV(xE3cm3)            | 7.396±7.3              | 10.199±5.7       | 0.196          | 9.143±8.01             | 4.662±8.1        | 0.583          | 0.054±0.7              | -0.438±0.7       | 0.004                            | 7.352±6.6                 | 10.199±6.5       | 0.101          | 7.462±8.5                 | 4.662±7.1        | 0.581 | 0.026±0.8                 | -0.543±0.4       | 0.073        | 9.140±6.4        | 13.625±12.1      | 0.149          | 5.182±7.1 | 9.937±14.5       | 0.216    | -0.099±0.8 | 0.001±0.4        | 0.718 |
|                                       | ADC_median(xE3mm2/s)       | 1.100±0.2              | 0.957±0.1        | 0.181          | 1.1277±0.2             | 1.149±0.2        | 0.148          | 0.221±0.2              | 0.224±0.1        | 0.775                            | 1.101±0.2                 | 0.896±0.1        | 0.019          | 1.299±0.2                 | 1.096±0.1        | 0.021 | 0.195±0.2                 | 0.224±0.1        | 0.893        | 1.048±0.2        | 1.035±0.1        | 0.236          | 1.198±0.2 | 1.323±0.2        | 0.371    | 0.224±0.2  | 0.206±0.1        | 0.836 |
|                                       | ADC_skewness               | 0.238±0.4              | 0.584±0.4        | 0.554          | 0.150±0.4              | 0.675±0.4        | 0.039          | -0.398±6.3             | 0.182±12.9       | 0.313                            | 0.136±0.4                 | 0.584±0.3        | 0.002          | 0.139±0.4                 | 0.691±0.2        | 0.000 | 0.539±11.3                | 0.182±0.4        | 0.027        | 0.459±0.4        | 0.554±0.4        | 0.271          | 0.233±0.4 | 0.351±0.6        | 0.606    | -0.19±10.2 | -0.510±2.2       | 0.823 |
|                                       | ADC_kurtosis               | 3.397±0.8              | 4.764±1.0        | 0.007          | 3.165±0.8              | 4.032±0.7        | 0.035          | -0.046±0.2             | -0.216±0.3       | 0.429                            | 3.357±0.6                 | 5.14±0.8         | 0.000          | 3.165±0.8                 | 4.032±0.7        | 0.005 | 0.006±0.2                 | 0.216±0.2        | 0.209        | 3.492±1.0        | 4.143±0.8        | 0.973          | 3.330±0.8 | 3.149±0.8        | 0.449    | -0.086±0.2 | -0.075±0.3       | 0.863 |
| IVIM                                  | D(mm2/s) xE3               | 0.913±0.1              | 0.853±0.1        | 0.042          | 1.036±0.2              | 1.055±0.3        | 1.000          | 0.158±0.3              | 0.278±0.2        | 0.120                            | 0.933±0.2                 | 0.801±0.1        | 0.010          | 1.059±0.2                 | 0.981±0.2        | 0.292 | 0.188±0.3                 | 0.278±0.2        | 0.358        | 0.874±0.1        | 0.862±0.2        | 0.372          | 1.034±0.2 | 1.068±0.2        | 0.850    | 0.261±0.3  | 0.191±0.3        | 0.159 |
|                                       | f(mm2/s) xE1               | 0.935±0.6              | 0.862±0.8        | 0.511          | 1.013±0.4              | 0.849±0.3        | 0.220          | 0.158±1.0              | -0.271±0.7       | 0.101                            | 0.607±0.6                 | 0.862±0.8        | 1.000          | 1.027±0.5                 | 0.843±0.3        | 0.160 | 0.011±1.0                 | 0.114±0.8        | 0.593        | 0.945±0.7        | 0.751±0.4        | 0.503          | 0.896±0.4 | 0.953±0.6        | 0.918    | 0.023±1.0  | 0.570±1.0        | 0.731 |
|                                       | D*(mm2/s) xE2              | 0.620±0.1              | 0.620±0.4        | 1.000          | 0.624±0.1              | 0.575±0.1        | 0.431          | -0.008±0.3             | -0.102±0.3       | 0.526                            | 0.639±0.1                 | 0.571±0.5        | 0.249          | 0.624±0.2                 | 0.545±0.1        | 0.098 | 0.008±0.3                 | 0.079±0.3        | 0.960        | 0.63±0.3         | 0.54±0.1         | 0.175          | 0.590±0.1 | 0.603±0.2        | 0.918    | 0.058±0.3  | 0.184±0.2        | 0.460 |
| DCE                                   | DCEGTV(cm3)                | 7.620±7.7              | 12.150±8.3       | 0.393          | 6.750±6.7              | 6.945±8.8        | 0.399          | -0.253±0.4             | -0.140±0.5       | 0.678                            | 7.620±6.4                 | 12.325±10.0      | 0.270          | 7.210±6.8                 | 6.600±9.2        | 0.558 | 0.231±0.5                 | 0.199±0.3        | 0.920        | 8.115±7.4        | 16.50±12.0       | 0.192          | 6.503±6.8 | 9.705±11.0       | 0.103    | 0.223±0.4  | -0.087±0.4       | 0.295 |
|                                       | Kep(min-1)                 | 0.744±0.3              | 0.854±0.3        | 0.018          | 0.659±0.2              | 0.630±0.3        | 0.526          | -0.101±0.3             | -0.308±0.4       | 0.096                            | 0.744±0.3                 | 0.843±0.3        | 0.482          | 0.648±0.3                 | 0.655±0.3        | 0.828 | 0.152±0.3                 | 0.158±0.5        | 0.664        | 0.754±0.3        | 0.794±0.3        | 0.979          | 0.658±0.2 | 0.517±0.3        | 0.011    | 0.118±0.3  | -0.283±0.3       | 0.059 |
|                                       | K <sup>trans</sup> (min-1) | 0.510±0.2              | 0.575±0.3        | 0.229          | 0.633±0.2              | 0.495±0.4        | 0.437          | 0.174±0.6              | 0.141±0.7        | 0.759                            | 0.550±0.2                 | 0.485±0.3        | 0.091          | 0.625±0.3                 | 0.525±0.3        | 0.867 | 0.161±0.5                 | 0.368±0.8        | 0.045        | 0.512±0.3        | 0.471±0.3        | 0.559          | 0.634±0.2 | 0.458±0.4        | 0.045    | 0.261±0.5  | 0.116±0.7        | 0.328 |
|                                       | V <sub>e</sub>             | 0.700±0.2              | 0.698±0.2        | 0.393          | 0.898±0.4              | 0.870±0.3        | 0.686          | 0.402±0.4              | 0.309±0.6        | 0.662                            | 0.700±0.2                 | 0.704±0.2        | 0.132          | 0.880±0.3                 | 0.932±0.3        | 0.894 | 0.391±0.4                 | 0.473±0.6        | 0.026        | 0.700±0.2        | 0.673±0.2        | 0.619          | 0.889±0.3 | 0.935±0.3        | 0.619    | 0.402±0.5  | 0.527±0.5        | 0.514 |
| 18F-FDG-PET                           | MATV(cm3) xE-5             | 0.068±0.1              | 0.089±0.04       | 0.074          | 0.056±0.1              | 0.050±0.0        | 0.913          | -0.259±0.6             | -0.441±0.3       | 0.483                            | 0.071±0.1                 | 0.089±0.1        | 0.110          | 0.055±0.1                 | 0.050±0.0        | 0.639 | 0.283±0.6                 | 0.441±0.2        | 0.789        | 0.077±0.1        | 0.130±0.1        | 0.049          | 0.050±0.1 | 0.07±0.1         | 0.180    | -0.387±0.5 | -0.267±0.4       | 0.744 |
|                                       | SUV_mean(Bq) xE-6          | 0.819±0.3              | 0.757±0.2        | 0.525          | 0.574±0.2              | 0.719±0.2        | 0.380          | -0.163±2.4             | -0.056±0.7       | 0.709                            | 0.720±0.3                 | 0.762±0.2        | 0.750          | 0.559±0.2                 | 0.72±0.2         | 0.032 | 0.170±2.3                 | 0.056±0.7        | 0.492        | 0.762±0.3        | 0.577±0.2        | 0.001          | 0.688±0.2 | 0.510±0.3        | 0.159    | 0.080±2.1  | -0.016±2.8       | 0.449 |
|                                       | SUV_peak(Bq) xE-1          | 0.125±0.3              | 0.932±0.4        | 0.001          | 0.579±0.3              | 0.770±0.3        | 0.254          | 2.714±3.2              | -0.128±0.2       | 0.002                            | 0.131±0.3                 | 0.996±0.4        | 0.001          | 0.579±0.3                 | 0.869±0.3        | 0.052 | 0.065±2.9                 | 0.128±2.8        | 0.402        | 0.133±0.4        | 0.406±0.3        | 0.331          | 0.734±0.3 | 0.479±0.2        | 0.110    | 0.074±3.0  | 0.392±2.2        | 0.139 |
|                                       | TLG(Bq*cm3)                | 0.039±0.1              | 0.068±0.04       | 0.083          | 0.275±0.4              | 0.359±0.1        | 1.000          | 6.498±16.5             | 4.278±5.4        | 0.013                            | 0.039±0.1                 | 0.068±0.1        | 0.132          | 0.270±0.2                 | 0.359±0.4        | 0.215 | 5.625±15.8                | 4.28±5.7         | 0.323        | 0.046±0.1        | 0.036±0.1        | 0.630          | 0.359±0.3 | 0.357±0.9        | 0.945    | 5.098±14.5 | 3.688±8.5        | 0.630 |

\* Mann-Whitney U analysis

The median of the primary tumor imaging parameters per patient outcome for locoregional recurrence-free survival, distant metastasis-free survival and overall survival. The significant differences between these groups is marked green (p<0.05).

**Table S4. Univariate and multivariate analysis predicting locoregional recurrence-free survival.**

| Locoregional recurrence-free survival |                                                  |              |                       |                    |                |                       |                           |             |                           |
|---------------------------------------|--------------------------------------------------|--------------|-----------------------|--------------------|----------------|-----------------------|---------------------------|-------------|---------------------------|
|                                       |                                                  | PRETREATMENT |                       |                    | INTRATREATMENT |                       |                           | DELTA       |                           |
| n=57 patients                         |                                                  | Univariate*  | Multivariate analysis |                    | Univariate*    | Multivariate analysis |                           | Univariate* | Multivariate analysis     |
| Parameters                            |                                                  | p-value      | p-value               | HR (95%CI)         | p-value        | p-value               | HR (95%CI)                | p-value     | p-value HR (95%CI)        |
| Clinical parameters                   | Gender                                           | 0.441        | -                     |                    |                |                       |                           |             |                           |
|                                       | Age                                              | 0.141        | -                     |                    |                |                       |                           |             |                           |
|                                       | T-stage                                          | 0.203        | -                     |                    |                |                       |                           |             |                           |
|                                       | N-stage                                          | 0.268        | -                     |                    |                |                       |                           |             |                           |
|                                       | HPV                                              | 0.710        | -                     |                    |                |                       |                           |             |                           |
|                                       | Location PT                                      | 0.378        | -                     |                    |                |                       |                           |             |                           |
|                                       | Tobacco usage                                    | 0.325        | -                     |                    |                |                       |                           |             |                           |
| DWI                                   | ADC_GTV (cm <sup>3</sup> )                       | 0.846        | -                     |                    | 0.501          | -                     | -                         | 0.154       | -                         |
|                                       | ADC_median (x10 <sup>3</sup> mm <sup>2</sup> /s) | 0.138        | -                     |                    | 0.122          | -                     |                           | 0.892       | -                         |
|                                       | ADC_Skewness                                     | 0.600        | -                     |                    | 0.219          | -                     |                           | 0.029       | 0.029 0.958 (0.923-0.996) |
|                                       | ADC_Kurtosis                                     | 0.011        | 0.011                 | 1.883 (1.16-3.06)  | 0.358          | -                     |                           | 0.457       | -                         |
| IVIM                                  | D (xE3 mm <sup>2</sup> /s)                       | 0.050        | 0.026                 | 0.018 (0.001-0.61) | 0.780          | -                     |                           | 0.336       | -                         |
|                                       | f (x10 mm <sup>2</sup> /s)                       | 0.217        | -                     |                    | 0.196          | -                     |                           | 0.126       | -                         |
|                                       | D* (xE2 mm <sup>2</sup> /s)                      | 0.270        | -                     |                    | 0.359          | -                     |                           | 0.259       | -                         |
| DCE                                   | DCE <sub>GTV</sub> (cm <sup>3</sup> )            | 0.726        | -                     |                    | 0.593          |                       |                           | 0.608       | -                         |
|                                       | K <sub>ep</sub> (min <sup>-1</sup> )             | 0.025        | -                     |                    | 0.774          | 0.040                 | 0.43E-4 (3.561E-9- 0.508) | 0.288       | 0.048 0.003 (0.000-0.962) |
|                                       | K <sup>trans</sup> (min <sup>-1</sup> )          | 0.099        | -                     |                    | 0.817          | 0.021                 | 235 (2.1 -26297)          | 0.834       | -                         |
|                                       | V <sub>e</sub>                                   | 0.448        | -                     |                    | 0.298          | 0.023                 | 0.023(0.001-0.565)        | 0.711       | -                         |
| 18F-FDG-PET                           | MATV (cm <sup>3</sup> )                          | 0.962        | -                     |                    | 0.550          | -                     |                           | 0.460       |                           |
|                                       | SUV_mean (Bq)                                    | 0.455        | -                     |                    | 0.837          | -                     | -                         | 0.150       | -                         |
|                                       | SUV_peak (Bq)                                    | 0.001        | 0.001                 | 10.5 (2.66-41.2)   | 0.534          | -                     |                           | 0.070       | -                         |
|                                       | TLG (Bq x cm <sup>3</sup> )                      | 0.679        | -                     |                    | 0.358          | 0.049                 | 0.004 (0.00-1.015)        | 0.144       | -                         |

Univariable (\*) and multivariable analysis of functional imaging parameters per modality predicting locoregional recurrence-free survival. Significantly prognostic parameters are marked green.

**Table S5. Univariate and multivariate analysis predicting distant metastasis-free survival.**

| <b>Distant metastasis-free survival</b> |                                                 |                     |                       |                      |                       |                       |                   |              |                         |
|-----------------------------------------|-------------------------------------------------|---------------------|-----------------------|----------------------|-----------------------|-----------------------|-------------------|--------------|-------------------------|
|                                         |                                                 | <b>PRETREATMENT</b> |                       |                      | <b>INTRATREATMENT</b> |                       |                   | <b>DELTA</b> |                         |
| n=57 patients                           |                                                 | Univariate          | Multivariate analysis |                      | Univariate            | Multivariate analysis |                   | Univariate   | Multivariate analysis   |
| Parameters                              |                                                 | p-value*            | p-value**             | HR (95%CI)           | p-value*              | p-value**             | HR (95%CI)        | p-value*     | p-value** HR (95%CI)    |
| Clinical parameters                     | Gender                                          | 0.058               | -                     |                      |                       |                       |                   |              |                         |
|                                         | Age                                             | 0.267               | -                     |                      |                       |                       |                   |              |                         |
|                                         | T-stage                                         | 0.013               | -                     |                      |                       |                       |                   |              |                         |
|                                         | N-stage                                         | 0.027               | 0.012                 | 3.227 (1.30-8.02)    |                       |                       |                   |              |                         |
|                                         | HPV                                             | 0.079               | -                     |                      |                       |                       |                   |              |                         |
|                                         | Location PT                                     | 0.561               | -                     |                      |                       |                       |                   |              |                         |
|                                         | Tobacco usage                                   | 0.276               | -                     |                      |                       |                       |                   |              |                         |
| DWI                                     | ADC_GTV (cm <sup>3</sup> )                      | 0.046               | -                     |                      | 0.262                 | -                     |                   | 0.071        | -                       |
|                                         | ADC_median (x10 <sup>3</sup> m <sup>2</sup> /s) | 0.038               | -                     |                      | 0.049                 | -                     |                   | 0.769        | -                       |
|                                         | ADC_Skewness                                    | 0.001               | -                     |                      | 0.005                 | 0.01                  | 3.359 (1.18-9.54) | 0.754        | -                       |
|                                         | ADC_Kurtosis                                    | <0.001              | <0.001                | 3.957 (2.09-7.51)    | 0.029                 | -                     |                   | 0.065        | -                       |
| IVIM                                    | D (xE3 mm <sup>2</sup> /s)                      | 0.019               | 0.019                 | 0.015 (0.0004-0.498) | 0.455                 | -                     |                   | 0.311        | -                       |
|                                         | f (x10 mm <sup>2</sup> /s)                      | 0.955               | -                     |                      | 0.199                 | -                     |                   | 0.447        | -                       |
|                                         | D* (xE2 mm <sup>2</sup> /s)                     | 0.774               | -                     |                      | 0.205                 | -                     |                   | 0.624        | -                       |
| DCE                                     | DCE <sub>GTV</sub> (cm <sup>3</sup> )           | 0.065               | -                     |                      | 0.138                 | -                     |                   | 0.364        | -                       |
|                                         | K <sub>ep</sub> (min <sup>-1</sup> )            | 0.815               | -                     |                      | 0.777                 | -                     |                   | 0.598        | -                       |
|                                         | K <sub>trans</sub> (min <sup>-1</sup> )         | 0.430               | -                     |                      | 0.927                 | -                     |                   | 0.015        | 0.015 2.617 (1.21-5.67) |
|                                         | V <sub>e</sub>                                  | 0.090               | -                     |                      | 0.858                 | -                     |                   | 0.041        | -                       |
| <sup>18</sup> F-FDG-PET                 | MATV (cm <sup>3</sup> )                         | 0.032               | -                     |                      | 0.017                 | -                     |                   | 0.489        | -                       |
|                                         | SUV_mean (Bq)                                   | 0.696               | -                     |                      | 0.195                 | -                     |                   | 0.420        | -                       |
|                                         | SUV_peak (Bq)                                   | 0.002               | 0.001                 | 9.356 (2.51-34.9)    | 0.307                 | -                     |                   | 0.088        | -                       |
|                                         | TLG (Bq x cm <sup>3</sup> )                     | 0.022               | 0.004                 | 3.1E4 (25.5-3.8E6)   | 0.008                 | 0.01                  | 2.13 (1.21-3.74)  | 0.885        | -                       |

\* Univariable Cox-regression analysis

\*\* Multivariable Cox-regression analysis

Multivariable analysis of functional imaging parameters per modality predicting distant metastasis. Significantly prognostic parameters are marked green.

**Table S6. Univariate and multivariate analysis predicting overall survival.**

| <b>Overall survival</b>               |                                                |                                          |                |                      |                       |                |                     |              |                |            |
|---------------------------------------|------------------------------------------------|------------------------------------------|----------------|----------------------|-----------------------|----------------|---------------------|--------------|----------------|------------|
|                                       |                                                | <b>PRETREATMENT</b>                      |                |                      | <b>INTRATREATMENT</b> |                |                     | <b>DELTA</b> |                |            |
| n=57 patients                         |                                                | Univariate*                              | Multivariate** |                      | Univariate*           | Multivariate** |                     | Univariate*  | Multivariate** |            |
| Parameters                            |                                                | p-value*                                 | p-value        | HR (95%CI)           | p-value*              | p-value        | HR (95%CI)          | p-value*     | p-value        | HR (95%CI) |
| Clinical parameters                   | Gender                                         | 0.89                                     | -              |                      |                       |                |                     |              |                |            |
|                                       | Age                                            | 0.92                                     | -              |                      |                       |                |                     |              |                |            |
|                                       | T-stage                                        | 0.17                                     | -              |                      |                       |                |                     |              |                |            |
|                                       | N-stage                                        | 0.17                                     | 0.03           | 3.373 (0.03-0.55)    |                       |                |                     |              |                |            |
|                                       | HPV                                            | 0.02                                     | 0.01           | 0.123 (0.03-0.55)    |                       |                |                     |              |                |            |
|                                       | Location PT                                    | 0.75                                     | -              |                      |                       |                |                     |              |                |            |
|                                       | Tobacco usage                                  | 0.24                                     | -              |                      |                       |                |                     |              |                |            |
| DWI                                   | ADC_GTV (cm <sup>3</sup> )                     | 0.02                                     | 0.02           | 1.059 (1.01-1.11)    | 0.01                  | 0.001          | 1.074 (1.03-1.12)   | 0.74         | -              |            |
|                                       | ADC_median (xE <sup>3</sup> m <sup>2</sup> /s) | 0.65                                     | -              | -                    | 0.69                  | -              |                     | 0.99         | -              |            |
|                                       | ADC_Skewness                                   | 0.10                                     | -              | -                    | 0.71                  | -              |                     | 0.83         | -              |            |
|                                       | ADC_Kurtosis                                   | 0.98                                     | -              | -                    | 0.33                  | -              |                     | 0.86         | -              |            |
| IVIM                                  | Dt (xE <sup>3</sup> mm <sup>2</sup> /s)        | 0.61                                     | -              |                      | 0.23                  | -              |                     | 0.10         |                |            |
|                                       | F (xE <sup>1</sup> mm <sup>2</sup> /s)         | 0.45                                     | -              |                      | 0.53                  | -              |                     | 0.72         |                |            |
|                                       | Dp (xE <sup>2</sup> mm <sup>2</sup> /s)        | 0.34                                     | -              |                      | 0.44                  | -              |                     | 0.22         |                |            |
| DCE                                   | DCE <sub>GTV</sub> (cm <sup>3</sup> )          | 0.02                                     | 0.02           | 1.054 (1.01-1.10)    | 0.02                  | 0.02           | 1.057 (1.01-1.11)   | 0.44         | -              |            |
|                                       | K <sub>ep</sub> (min <sup>-1</sup> )           | 0.85                                     | -              |                      | 0.25                  |                |                     | 0.11         | 0.001          | 0.00-0.56) |
|                                       | K <sup>trans</sup> (min <sup>-1</sup> )        | 0.74                                     | -              |                      | 0.39                  |                |                     | 0.55         | -              |            |
|                                       | V <sub>e</sub>                                 | 0.46                                     | -              |                      | 0.94                  |                |                     | 0.54         | -              |            |
| <sup>18</sup> F-FDG-PET               | MATV (cm <sup>3</sup> )                        | 0.00                                     | 0.001          | 1454.6 (11.54-1.8E5) | 0.01                  | 0.001          | 259.3 (5.76-1.17E4) | 0.72         | -              |            |
|                                       | SUV_mean (Bq)                                  | 0.02                                     | 0.03           | 0.228 (0.06-0.89)    | 0.08                  | -              |                     | 0.80         | -              |            |
|                                       | SUV_peak (Bq)                                  | 0.45                                     | -              |                      | 0.16                  | -              |                     | 0.07         | -              |            |
|                                       | TLG (Bq x cm <sup>3</sup> )                    | 0.60                                     | -              |                      | 0.07                  | -              |                     | 0.70         | -              |            |
| * Univariable Cox-regression analysis |                                                | ** Multivariable Cox-regression analysis |                |                      |                       |                |                     |              |                |            |

Multivariable analysis of functional imaging parameters per modality predicting adverse overall survival. Significantly prognostic parameters are marked green.

**Table S7. Logistic-regression prognostic models of primary tumours**

| Logistic-regression prognostic models of primary tumours |                           |              |                    |        |                            |        |
|----------------------------------------------------------|---------------------------|--------------|--------------------|--------|----------------------------|--------|
| Outcome                                                  | Model                     | Imaging time | Selected features  |        | Selected Clinical features |        |
| Locoregional recurrence-free survival                    | Pretreatment              |              | Intercept = -2.246 | Slope  | Intercept = -1.859         | Slope  |
|                                                          |                           |              | ADC_kurtosis       | 0.211  | AD_Ckurtosis               | 0.134  |
|                                                          |                           |              | SUV_peak           | 2.145  | SUV_peak                   | 1.945  |
|                                                          | Intratreatment            |              | Intercept = -      |        | Intercept = -              |        |
|                                                          |                           |              | -                  |        | -                          |        |
|                                                          | Delta                     |              | Intercept = -0.471 |        | Intercept = -0.244         |        |
|                                                          |                           |              | ADCGTV             | -0.558 | Age                        | 0.0008 |
|                                                          |                           |              | ADC_median         | 5.154  | N-stage                    | 0.709  |
|                                                          |                           |              | ADC_skewness       | -0.041 | ADC_skewness               | -0.003 |
|                                                          |                           |              | D                  | 0.030  | f                          | -0.005 |
|                                                          |                           |              | f                  | -0.459 | SUV_peak                   | -0.368 |
|                                                          |                           |              | DCE_GTV            | 0.222  | TLG                        | -0.026 |
|                                                          |                           |              | Kep                | -0.235 |                            |        |
|                                                          |                           |              | Ve                 | 0.458  |                            |        |
|                                                          |                           |              | SUV_peak           | -0.627 |                            |        |
|                                                          |                           |              | TLG                | -0.075 |                            |        |
|                                                          | Pre-/intratreatment/delta |              | Intercept = -2.173 |        | Intercept = -1.804         |        |
|                                                          |                           |              | PRE-ADC_kurtosis   | 0.317  | PRE-ADC_kurtosis           | 0.235  |
|                                                          |                           |              | PRE-Kep            | 0.169  | PRE-SUV_peak               | 1.444  |
|                                                          |                           |              | PRE-SUV_peak       | 1.470  | Δ-ADC_skewness             | -0.002 |
|                                                          |                           |              | Δ-ADC_skewness     | 0.011  | Δ-SUV_peak                 | -0.15  |
|                                                          |                           |              | Δ-f                | -0.036 | Δ-TLG                      | -0.002 |
|                                                          |                           |              | Δ-SUV_peak         | -0.191 |                            |        |
|                                                          |                           |              | Δ-TLG              | -0.009 |                            |        |
| Distant metastasis                                       | Pretreatment              |              | Intercept = -5.950 |        | Intercept = -7.511         |        |
|                                                          |                           |              | ADC_kurtosis       | 1.695  | Gender                     | 0.079  |
|                                                          |                           |              | D                  | 0.971  | Tobacco                    | -0.166 |
|                                                          |                           |              | SUV_peak           | 0.203  | ADC_kurtosis               | 1.542  |
|                                                          |                           |              |                    |        | PRE-D*                     | 0.700  |
|                                                          | Intratreatment            |              |                    |        | PRE-SUV_peak               | 0.166  |
|                                                          |                           |              | Intercept = -1.268 |        | Intercept = -1.949         |        |
|                                                          |                           |              | ADC_skewness       | 1.223  | Gender                     | 0.996  |
|                                                          |                           |              |                    |        | HPV                        | 0.149  |
|                                                          |                           |              |                    |        | T-stage                    | -0.392 |
|                                                          | Delta                     |              |                    |        | ADC_skewness               | 1.362  |
|                                                          |                           |              | Intercept = -1.616 |        | Intercept = -10.144        |        |
|                                                          |                           |              | ADCGTV             | -0.581 | Gender                     | 1.54   |
|                                                          |                           |              | ADC_kurtosis       | -3.044 | Age                        | 0.104  |
|                                                          |                           |              | D                  | 1.154  | HPV                        | 0.676  |
|                                                          |                           |              | Ve                 | 0.648  | Tobacco                    | -0.796 |
|                                                          |                           |              | SUV_mean           | -0.114 | N-stage                    | 0.355  |
|                                                          |                           |              |                    |        | ADC_GTV                    | -0.018 |
|                                                          |                           |              |                    |        | ADC_skewness               | 0.0004 |
|                                                          |                           |              |                    |        | ADC_Kurtosis               | -4.846 |
|                                                          |                           |              |                    |        | D                          | 2.635  |
|                                                          |                           |              |                    |        | Ve                         | 1.001  |
|                                                          |                           |              |                    |        | SUV_peak                   | -0.106 |
|                                                          |                           |              |                    |        | SUV_mean                   | -0.151 |
|                                                          |                           |              | Intercept = -6.754 |        | Intercept = - 5.950        |        |

|                  |                           |                    |        |                    |        |
|------------------|---------------------------|--------------------|--------|--------------------|--------|
| Overall survival | Pre-/intratreatment/delta | PRE-ADC_kurtosis   | 1.392  | PRE-ADC_kurtosis   | 1.277  |
|                  |                           | INRA-ADC_skewness  | 0.154  | PRE-SUV_peak       | 0.017  |
|                  |                           | PRE-D*             | 0.333  |                    |        |
|                  |                           | PRE-SUVpeak        | 0.149  |                    |        |
|                  | Pretreatment              | Intercept = -1.080 |        | Intercept = -1.387 |        |
|                  |                           | ADC_skewness       | 0.174  | Gender             | -0.685 |
|                  |                           | MATV               | 6.541  | HPV                | -3.196 |
|                  |                           | SUV_mean           | -0.979 | N-stage            | 0.908  |
|                  |                           |                    |        | PRE-ADC_skewness   | 0.926  |
|                  |                           |                    |        | PRE-D              | -0.139 |
|                  |                           |                    |        | PRE-f              | -0.278 |
|                  |                           |                    |        | PRE-MATV           | 8.64   |
|                  |                           |                    |        | PRE-SUV_peak       | -0.836 |
|                  |                           |                    |        | PRE-SUV_mean       | 1.886  |
|                  | Intratreatment            | Intercept = -      |        | Intercept = -1.178 |        |
|                  |                           | -                  |        | HPV-status         | -1.487 |
|                  |                           |                    |        | N-stage            | 0.51   |
|                  |                           |                    |        | INTRA-DCE_GTV      | 0.022  |
|                  |                           |                    |        | INRA_MATV          | 2.243  |
|                  | Delta                     | Intercept = -0.856 |        | Intercept = -0.659 |        |
|                  |                           | SUV_peak           | -1.159 | HPV-status         | -1.444 |
|                  |                           |                    |        | N-stage            | 0.532  |
|                  |                           |                    |        | $\Delta$ -D        | 0.304  |
|                  |                           |                    |        | $\Delta$ -SUV_peak | -0.099 |
|                  | Pre-/intratreatment/delta | Intercept = -1.151 |        | Intercept = -1.072 |        |
|                  |                           | PRE-MATV           | 3.726  | HPV-status         | -1.369 |
|                  |                           | PRE-SUV_mean       | -0.178 | N-stage            | 0.158  |
|                  |                           |                    |        | PRE-ADC_skewness   | 0.479  |
|                  |                           |                    |        | PRE-MATV           | 5.163  |
|                  |                           |                    |        | PRE-SUV_peak       | -0.049 |
|                  |                           |                    |        | PRE-SUV_mean       | -0.312 |
|                  |                           |                    |        | $\Delta$ -Kep      | -0.027 |
|                  |                           |                    |        | $\Delta$ -SUV_peak | -0.049 |

Table S7. Lasso logistic-regression in pretreatment, intratreatment and delta-imaging features and combined for predicting LRFFS, DMFS and OS. Lambda = median cross-validated lambda with 10 folds and 500 repeats. Intercept and slope were presented for each model.



Table S8. Cox-regression prognostic models of primary tumours

| Cox-regression prognostic models of primary tumours |                           |              |                        |              |                                      |
|-----------------------------------------------------|---------------------------|--------------|------------------------|--------------|--------------------------------------|
| Outcome                                             | Model                     | Imaging time | Selected features      | Hazard ratio | Selected Clinical + imaging features |
| Locoregional recurrence-free survival               | Pretreatment              |              | PRE-ADC_kurtosis       | 1.101        | PRE-ADC_kurtosis                     |
|                                                     |                           |              | PRE-Kep                | 1.813        | PRE-Kep                              |
|                                                     |                           |              | PRE-SUV_peak           | 3.858        | PRE-SUV_peak                         |
|                                                     | Intratreatment            |              | -                      | -            | -                                    |
|                                                     |                           |              | -                      | -            | -                                    |
|                                                     |                           |              | -                      | -            | -                                    |
|                                                     |                           |              | -                      | -            | -                                    |
|                                                     | Delta                     |              | $\Delta$ -ADC_GTV      | 0.682        | Age                                  |
|                                                     |                           |              | $\Delta$ -ADC_median   | 12.472       | N-stage                              |
|                                                     |                           |              | $\Delta$ -ADC_skewness | 0.982        | ADC_skewness                         |
|                                                     |                           |              | $\Delta$ -D            | 0.887        | f                                    |
|                                                     |                           |              | $\Delta$ -f            | 1.298        | SUV_mean                             |
|                                                     |                           |              | $\Delta$ -Kep          | 0.735        | SUV_peak                             |
|                                                     |                           |              | $\Delta$ -SUV_mean     | 0.770        |                                      |
|                                                     | Pre-/intratreatment/delta |              | $\Delta$ -SUV_peak     | 0.684        |                                      |
|                                                     |                           |              | PRE-ADC_kurtosis       | 1.235        | PRE-ADC_kurtosis                     |
|                                                     |                           |              | PRE-D                  | 0.753        | PRE-D                                |
|                                                     |                           |              | PRE-Kep                | 2.321        | PRE-Kep                              |
|                                                     |                           |              | PRE-SUV_peak           | 2.004        | PRE-SUV_peak                         |
|                                                     |                           |              | $\Delta$ -ADC_skewness | 0.971        | $\Delta$ -ADC_skewness               |
|                                                     |                           |              | $\Delta$ -f            | 0.966        | $\Delta$ -f                          |
|                                                     |                           |              | $\Delta$ -SUV_mean     | 0.903        | $\Delta$ -SUV_mean                   |
| Distant metastasis                                  | Pretreatment              |              | $\Delta$ -SUV_peak     | 0.818        | $\Delta$ -SUV_peak                   |
|                                                     |                           |              | PRE-ADC_skewness       | 1.568        | PRE-ADC_skewness                     |
|                                                     |                           |              | PRE-ADC_kurtosis       | 1.952        | PRE-ADC_kurtosis                     |
|                                                     |                           |              | PRE-SUV_peak           | 1.646        | PRE-SUV_peak                         |
|                                                     | Intratreatment            |              | PRE-TLG                | 3.923        |                                      |
|                                                     |                           |              | INTRA-ADC_skewness     | 1.640        | Gender                               |
|                                                     |                           |              | INTRA-TLG              | 1.006        | Tobacco use                          |
|                                                     |                           |              |                        |              | T-stage                              |
|                                                     |                           |              |                        |              | INTRA-ADC_skewness                   |
|                                                     |                           |              |                        |              | INTRA-MATV                           |
|                                                     |                           |              |                        |              | INTRA-TLG                            |
|                                                     |                           |              |                        |              |                                      |
|                                                     | Delta                     |              | $\Delta$ -ADCGTV       | 0.842        | Gender                               |
|                                                     |                           |              | $\Delta$ -ADC_kurtosis | 0.609        | Tobacco use                          |
|                                                     |                           |              | $\Delta$ -Ktrans       | 1.404        | T-stage                              |
|                                                     |                           |              | $\Delta$ -Ve           | 1.164        | N-stage                              |
|                                                     |                           |              | $\Delta$ -SUV_peak     | 0.965        | $\Delta$ -ADC_kurtosis               |
|                                                     |                           |              |                        |              | $\Delta$ -Ktrans                     |
|                                                     |                           |              |                        |              | $\Delta$ -Ve                         |
|                                                     |                           |              |                        |              | $\Delta$ -SUV_peak                   |
|                                                     |                           |              | $\Delta$ -ADC_kurtosis | 1.822        | PRE-ADC_skewness                     |

|                  |                           |                    |        |                    |        |
|------------------|---------------------------|--------------------|--------|--------------------|--------|
| Overall survival | Pre-/intratreatment/delta | PRE-SUV_peak       | 1.063  | PRE-ADC_kurtosis   | 1.869  |
|                  |                           |                    |        | PRE-SUV_peak       | 1.151  |
|                  | Pretreatment              | PRE-ADC_skewness   | 1.025  | HPV                | 0.237  |
|                  |                           | PRE-MATV           | 164.50 | N-stage            | 1.153  |
|                  |                           | PRE-SUV_mean       | 0.419  | PRE-ADC_skewness   | 1.823  |
|                  |                           |                    |        | PRE-MATV           | 125.25 |
|                  |                           |                    |        | PRE-SUV_mean       | 0.439  |
|                  |                           |                    |        | PRE-SUV_peak       | 1.810  |
|                  | Intratreatment            | INTRA-ADCGTV       | 1.014  | HPV                | 0.604  |
|                  |                           | INTRA-MATV         | 1.802  | ADC_GTV            | 1.014  |
|                  |                           |                    |        | MATV               | 1.802  |
|                  | Delta                     | $\Delta$ -D        | 1.692  | HPV                | 0.37   |
|                  |                           | $\Delta$ -D*       | 0.939  | N-stage            | 1.576  |
|                  |                           | $\Delta$ -Kep      | 0.842  | D                  | 1.054  |
|                  |                           | $\Delta$ -SUV_peak | 0.914  | Kep                | 0.842  |
|                  |                           |                    |        | SUV_peak           | 0.915  |
|                  | Pre-/intratreatment/delta | PRE-MATV           | 35.492 | HPV-status         | 0.485  |
|                  |                           | PRE-SUV_mean       | 0.614  | PRE-ADC_skewness   | 1.250  |
|                  |                           |                    |        | PRE-MATV           | 58.848 |
|                  |                           |                    |        | PRE-SUV_mean       | 0.593  |
|                  |                           |                    |        | $\Delta$ -Kep      | 0.9799 |
|                  |                           |                    |        | $\Delta$ -SUV_peak | 0.977  |

Table S9. Lasso cox-regression in pretreatment, intratreatment and delta-imaging features and combined for predicting LRFFS, DMFS and OS. The selected features are presented with the hazard ratios. Lambda = median cross-validated lambda with 10 folds and 500 repeats.

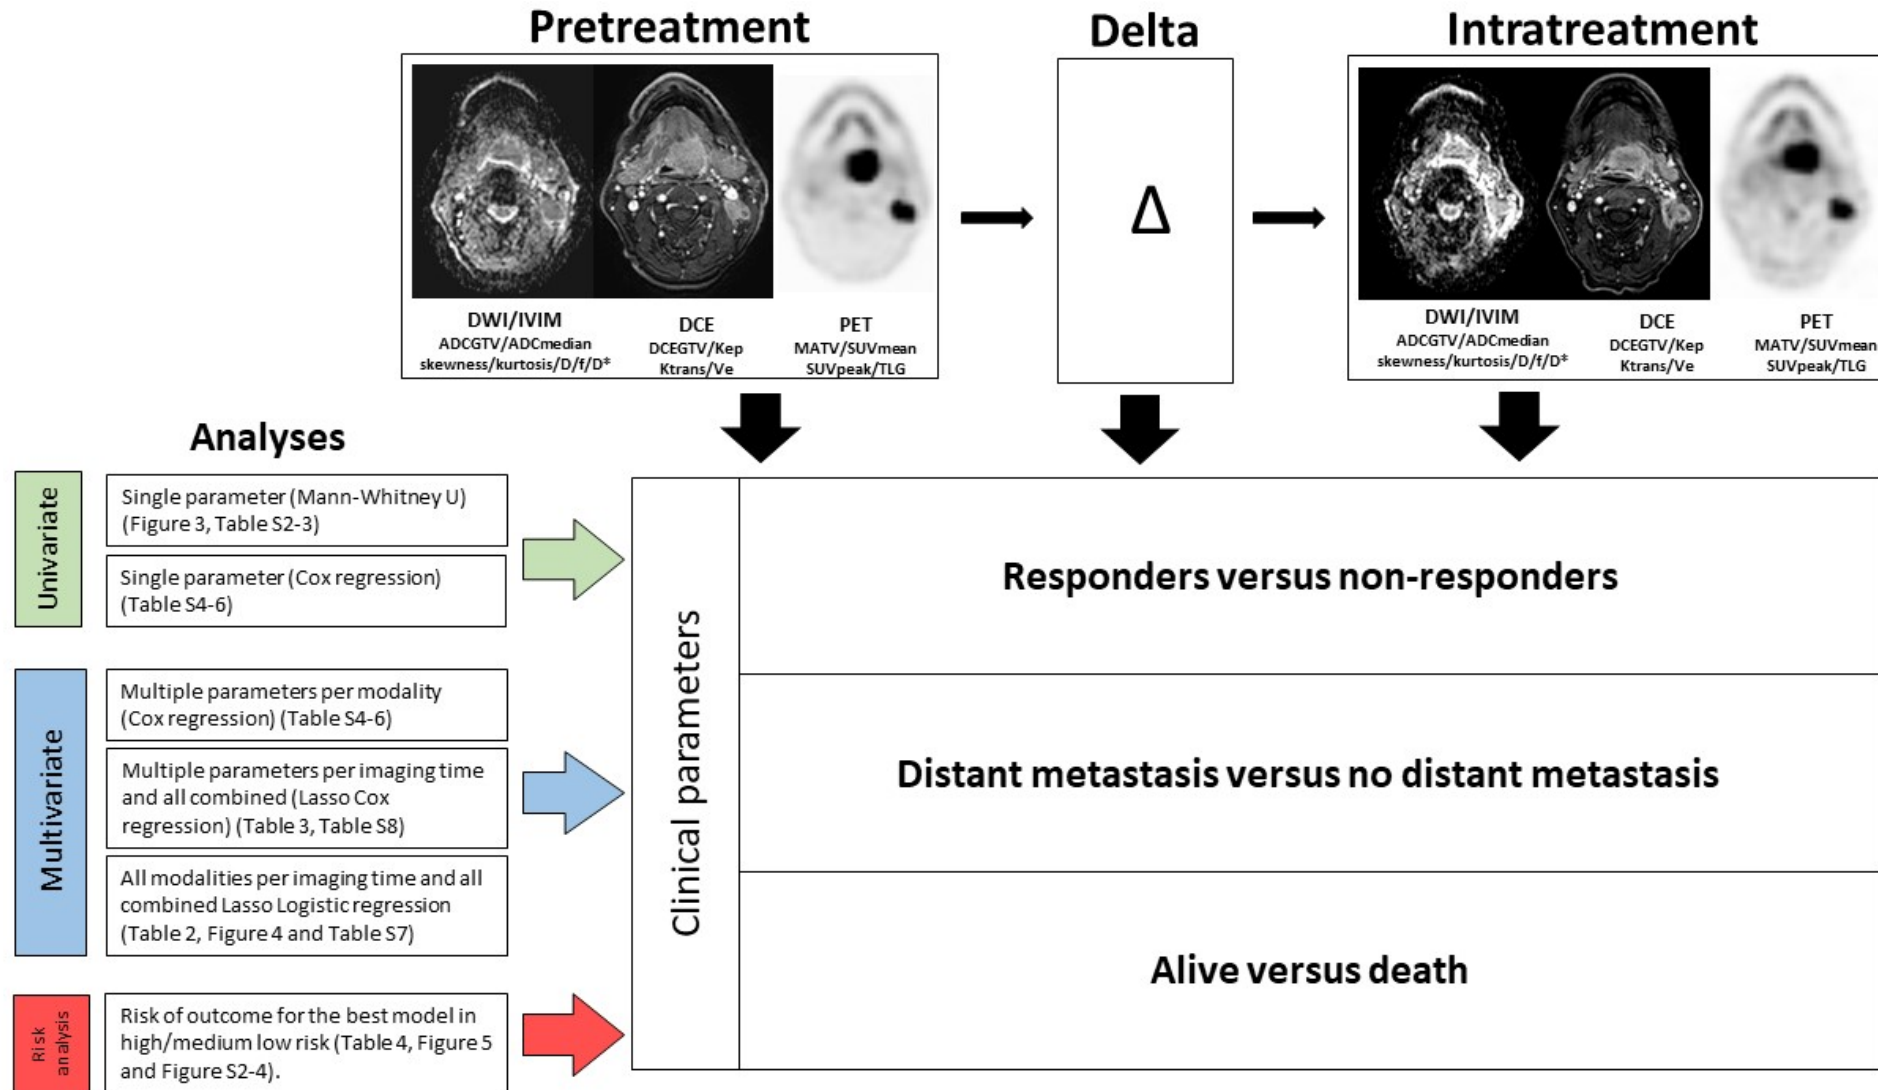

**Figure S1.** Overview of performed analysis in current study with the univariate/multivariate and risk analysis for primary tumors in pretreatment, delta and intratreatment imaging times and all three combined.

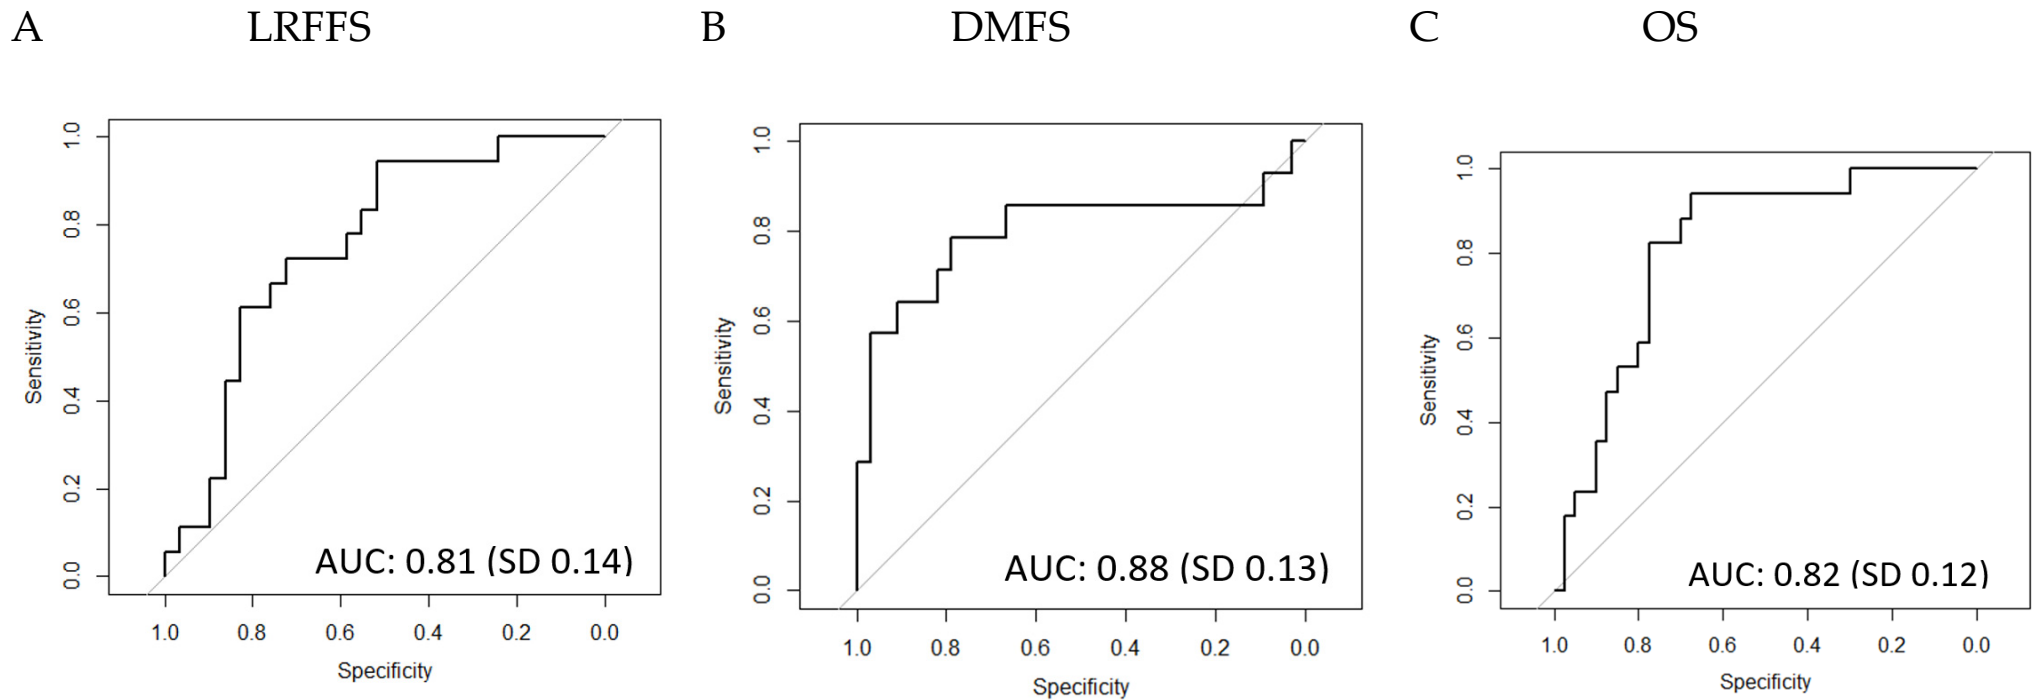

**Figure S2.** The area under the curves for the high risk group of patients, using the best (A) locoregional recurrence-free survival (LRFFS), (B) distant-metastasis-free survival (DMFS) and (C) overall survival (OS)

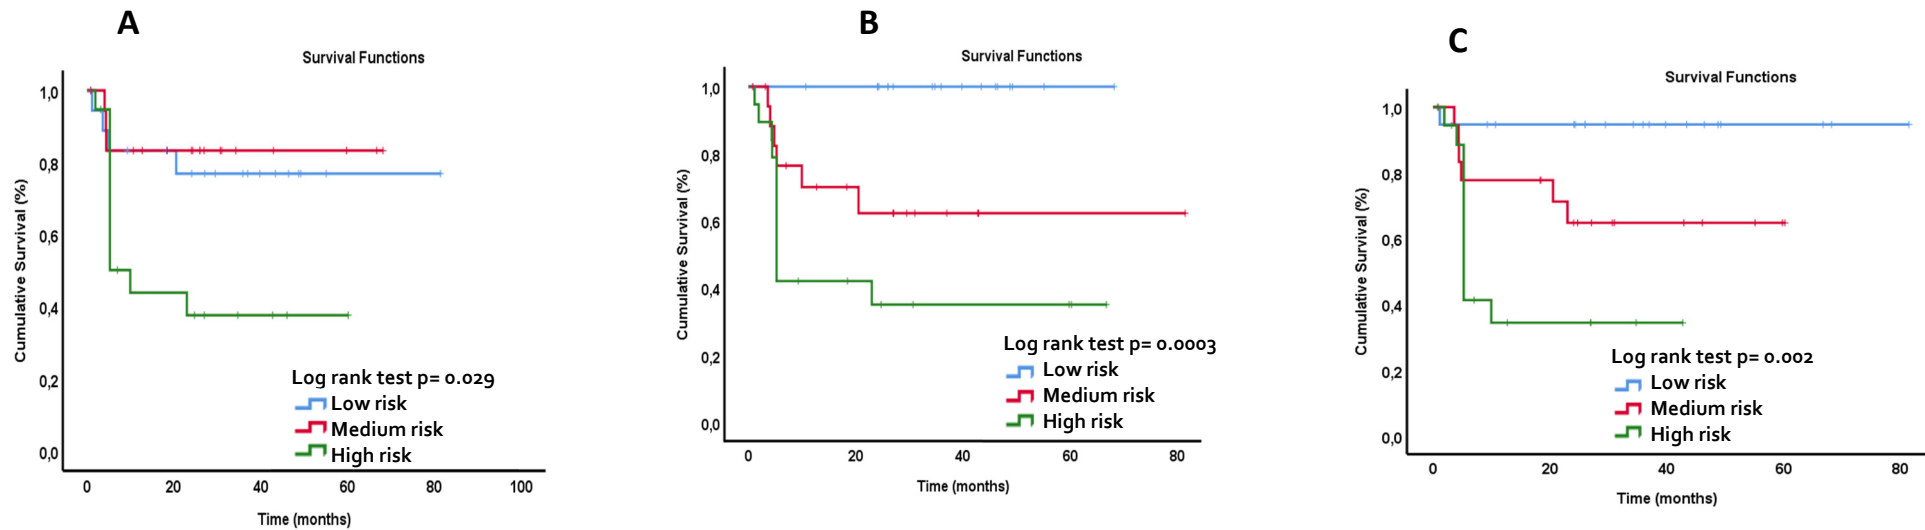

**Figure S3.** Kaplan meier curves with logrank test for locoregional recurrence-free survival divided in high/medium/low risk patient groups for pretreatment (A), intratreatment (B) and delta parameters (C).

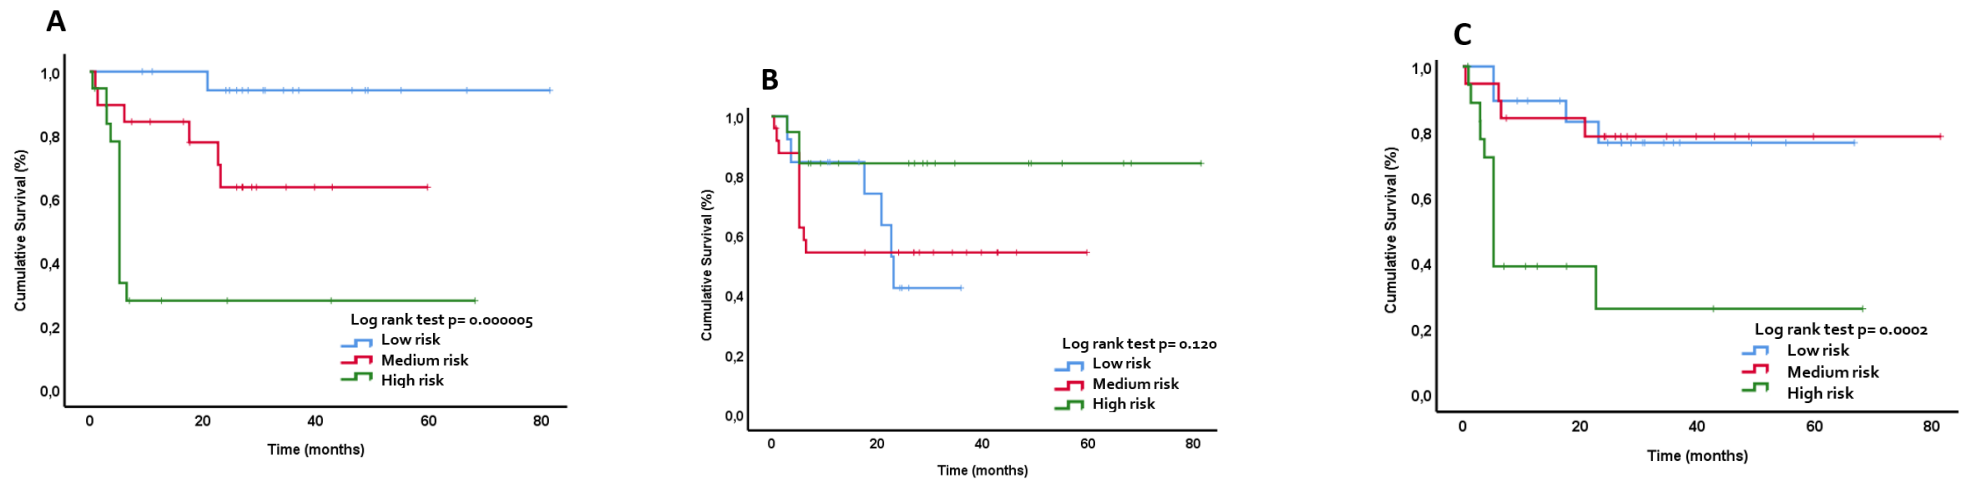

**Figure S4.** Kaplan Meier curves with logrank test for distant metastasis-free survival divided in high/medium/low risk patient groups for pretreatment (A), intratreatment (B) and delta parameters (C).

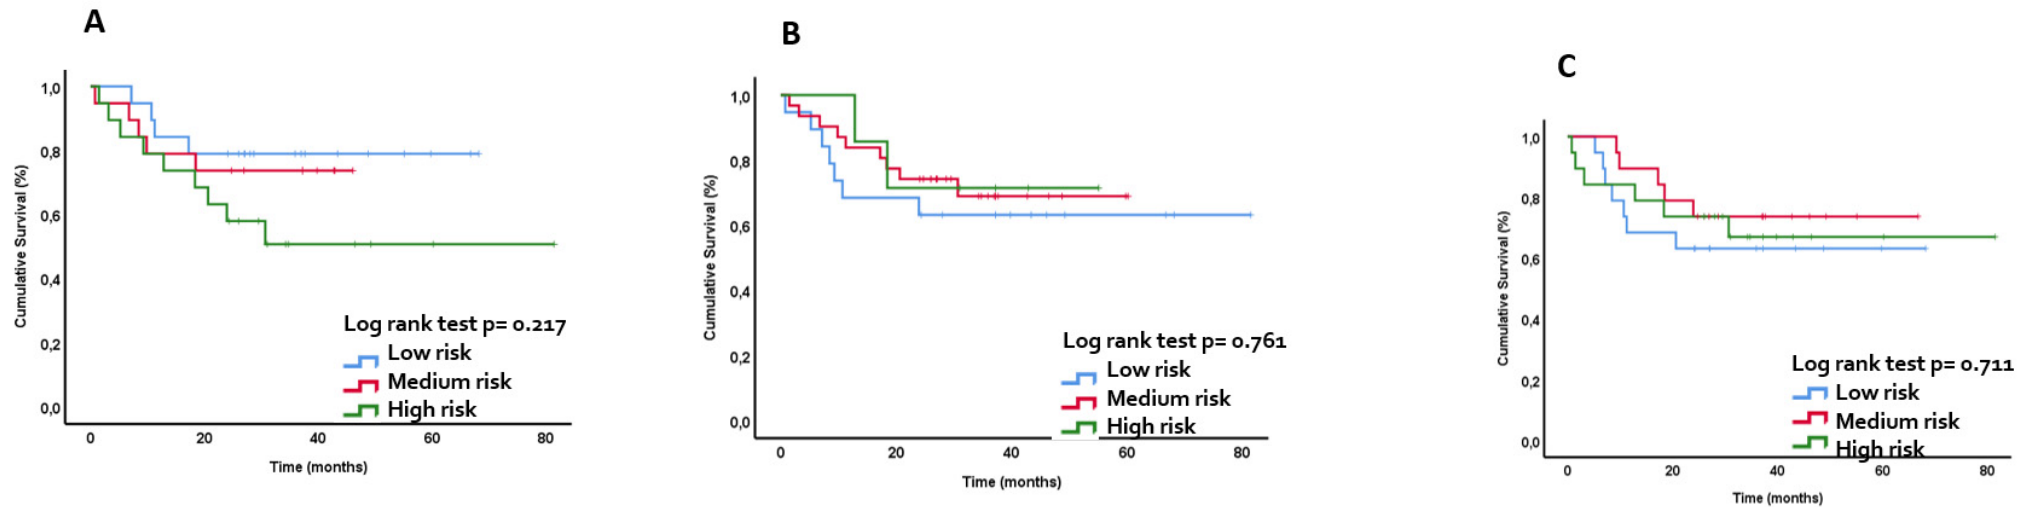

**Figure S5.** Kaplan meier curves with logrank test for overall survival divided in high/medium/low risk patient groups for pretreatment (A), intratreatment (B) and delta parameters (C).
